# Supplementary material
Source: Springer Nature journal article supplement (https://www.springermedizin.de/resource/supplementary/12885_2011_2895_MOESM1_ESM.pdf/9462202)

### **BRISBANE WOMEN ONLY**

8<sup>th</sup> June – 27<sup>th</sup> October 2009  
RBWH women assessed for eligibility  
(n=28)

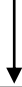

Ineligible = 86%:

- Borderline tumour (n=3)
- <18 years (n=2)
- Unable to communicate in English (n=1)
- No chemotherapy (n=2)
- Live too far away for regular face-to-face visits (n=16)

Excluded = 4%

- No consent to contact – too sick (n=1)

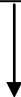

### **RECRUITMENT**

Recruitment rate = 83%:

- Allocated to intervention (n=17)
- Refused to participate (n=10)

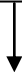

### **FOLLOW-UP**

Retention rate = 100%:

- Analysis (n=17)

### **ALL WOMEN**

28<sup>th</sup> October – 14<sup>th</sup> September 2010  
RBWH women assessed for eligibility  
(n=34)

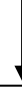

Ineligible = 18%:

- Borderline tumour (n=3)
- Recent prior malignancy (n=1)
- Cognitive impairment (n=1)
- No chemotherapy (n=1)

Excluded = 12%

- No consent to contact – too sick (n=4)

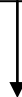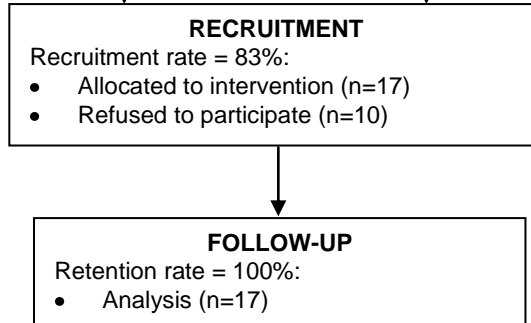

Supplement: MOESM1 [file 9462202]
